# Supplementary material
Source: Springer Nature journal article supplement (https://www.springermedizin.de/resource/supplementary/12889_2012_5049_MOESM13_ESM.pdf/9493162)
Supplement: MOESM13 [file 9493162]

District: Muang Phisanulok  
6501

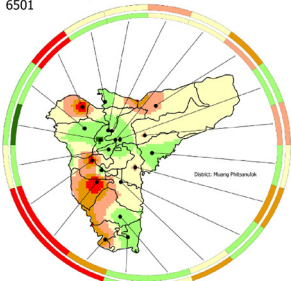

District: Nakhon Thai  
6502

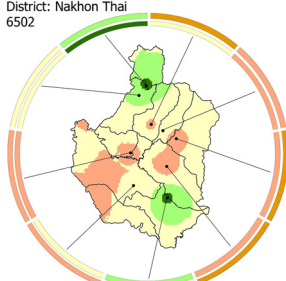

District: Chatlakan  
6503

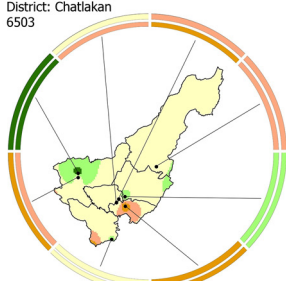

District: Bang Rakam  
6504

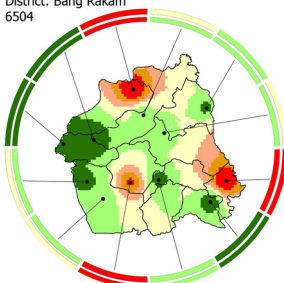

District: Bang Krathum  
6505

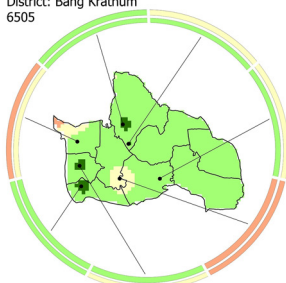

District: Phom Phiram  
6506

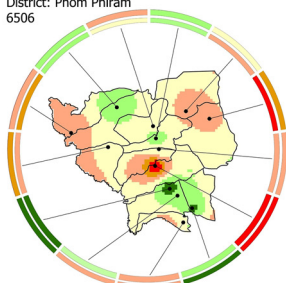

District: Wat Bot  
6507

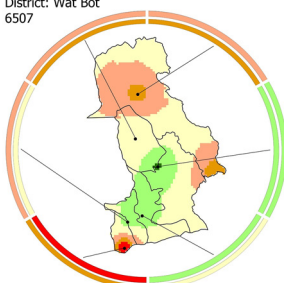

District: Wang Thong  
6508

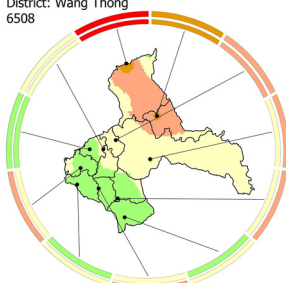

District: Noen Mapang  
6509

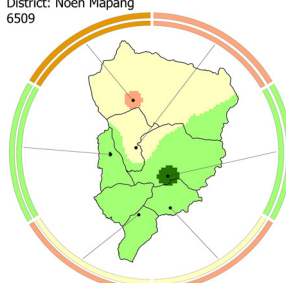

### Indices(%)

| B.I.      | C.I.    | H.I.      | B.I.      | C.I.    | H.I.      |
|-----------|---------|-----------|-----------|---------|-----------|
| 0.0-10.0  | 0.0-1.0 | 0.0-5.0   | 30.0-40.0 | 3.0-4.0 | 15.0-20.0 |
| 10.0-20.0 | 1.0-2.0 | 5.0-10.0  | 40.0-50.0 | 4.0-5.0 | 20.0-25.0 |
| 20.0-30.0 | 2.0-3.0 | 10.0-15.0 | >50       | >5      | >25       |

### Ring Key

-  House Index(Outer Ring)
-  Container Index(Inner Ring)

Breteau Index (Base map)
